# Supplementary material for: Time-Dependent Controlled Release of Ferulic Acid from Surface-Modified Hollow Nanoporous Silica Particles
Source: MDPI journal article supplement (doi:10.3390/ijms241310560), 2023-06-23
Supplement: s1 [file s1]

**Supporting Information for:**

# **Time dependent controlled release of ferulic acid from surface modified hollow nanoporous silica particles**

**Tetsuo Yamaguchi,<sup>1</sup> Taeho Kim<sup>1</sup> Jin-Kuen Park<sup>2\*</sup>, and Jae-Min Oh<sup>1\*</sup>**

*<sup>1</sup>Department of Energy and Materials Engineering, Dongguk University-Seoul, Seoul 04620, Korea*

*<sup>2</sup>Department of Chemistry, Hankuk University of foreign studies, Gyeonggi-do, Korea*

E-mail: J.-M. Oh [jaemin.oh@dongguk.edu](mailto:jaemin.oh@dongguk.edu)

J.-K. Park [jinkuenpark@gmail.com](mailto:jinkuenpark@gmail.com)

## 2. Adsorption isotherms

### Fickian model

#### In deionized water

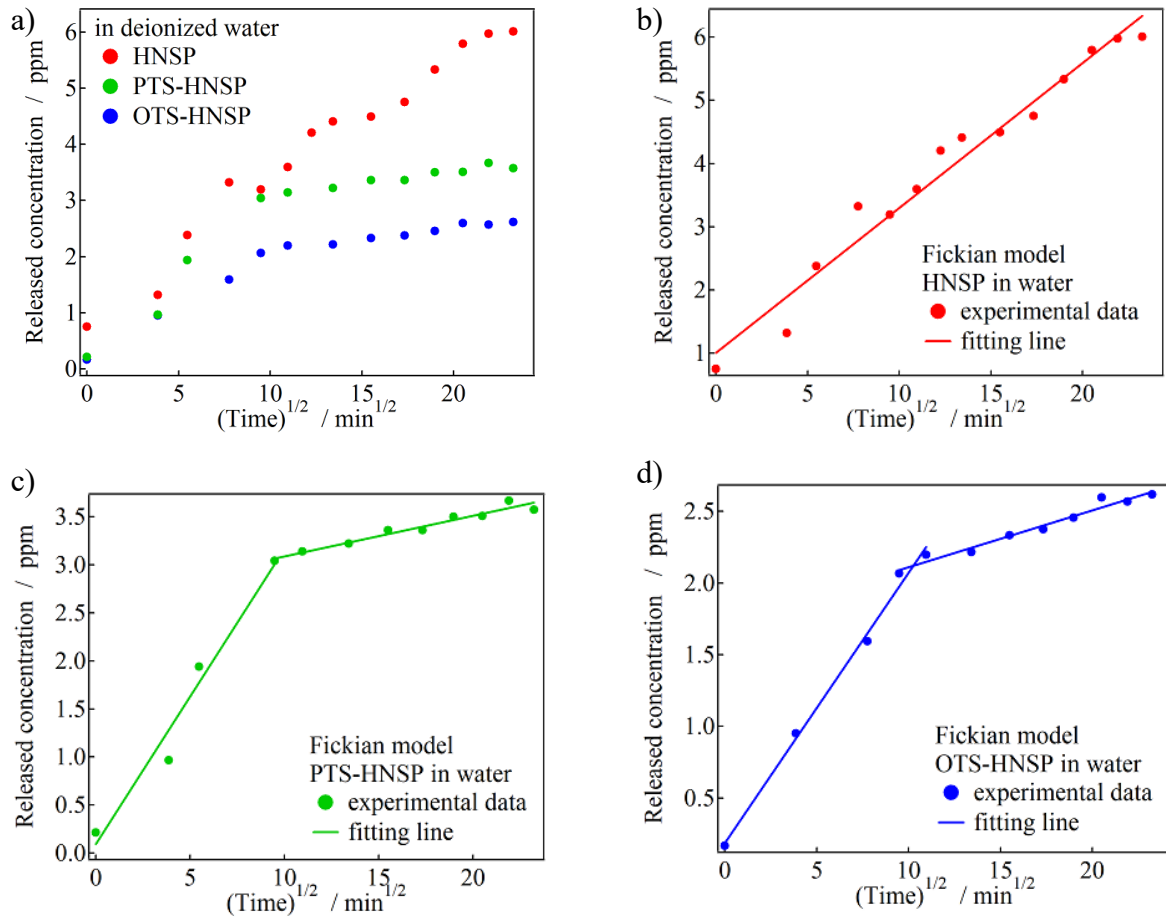

Figure S1 a) Fickian plots of time dependent FA release in deionized water and (b-d) fitting lines with Fickian equation mentioned in equation 2 in the main manuscript of b) HNSP, c) PTS-HNSP and d) OTS-HNSP.

Table S1. Fitting parameters for Fickian equation of HNSP, PTS-HNSP and OTS-HNSP in DI water.

| Carrier  | $k_H$  | $\chi^2$ |
|----------|--------|----------|
| HNSP     | 0.222  | 1.04     |
| PTS-HNSP | 0.358  | 0.0998   |
|          | 0.0423 | 0.0164   |
| OTS-HNSP | 0.183  | 0.0144   |
|          | 0.0398 | 0.00996  |

In EtOH

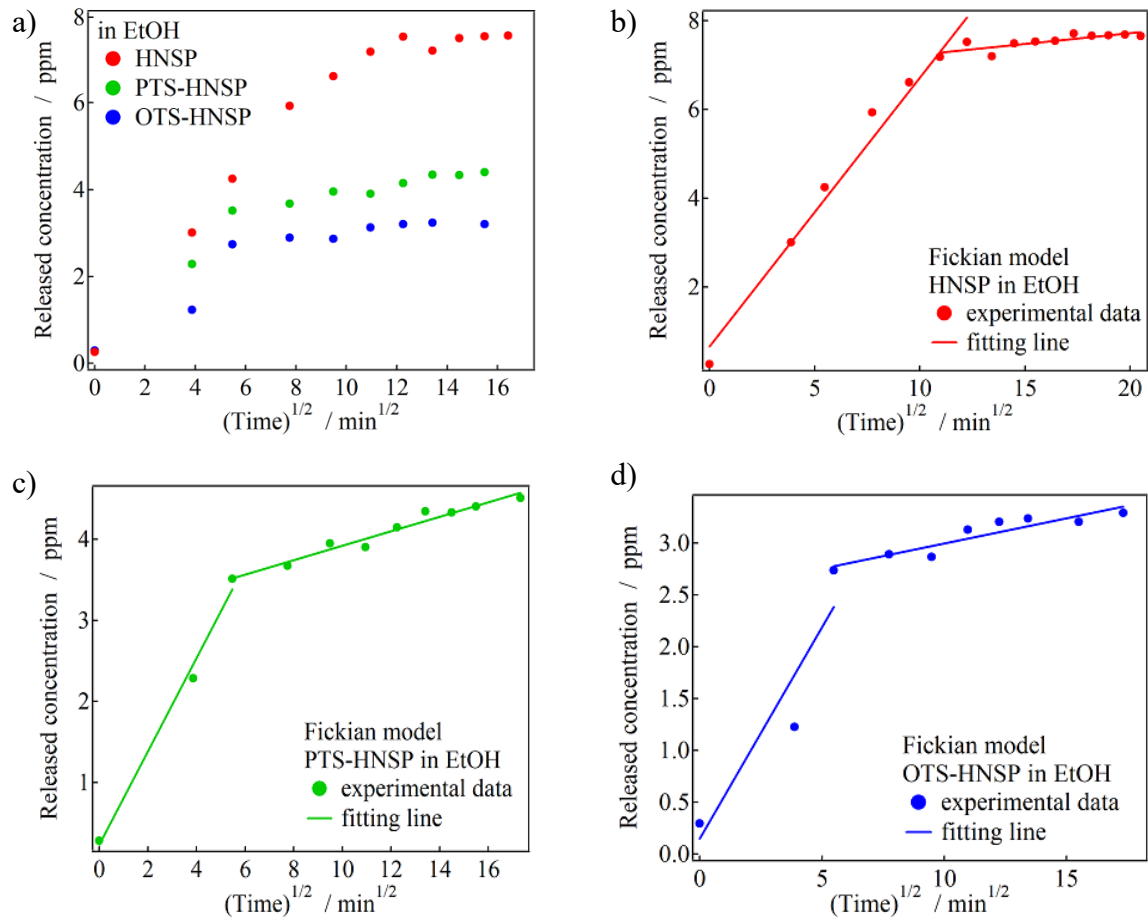

Figure S2 a) Fickian plots of time dependent FA release in EtOH and (b-d) fitting lines with Fickian equation mentioned in equation 2 in the main manuscript of b) HNSP, c) PTS-HNSP and d) OTS-HNSP.

Table S2. Fitting parameters for Fickian equation of HNSP, PTS-HNSP and OTS-HNSP in EtOH.

| Carrier  | $k_H$  | $\chi^2$ |
|----------|--------|----------|
| HNSP     | 0.605  | 0.929    |
|          | 0.0487 | 0.109    |
| PTS-HNSP | 0.576  | 0.0500   |
|          | 0.0892 | 0.0368   |
| OTS-HNSP | 0.408  | 0.397    |
|          | 0.0487 | 0.00427  |

## Korsmeyer-Peppas model

### In deionized water

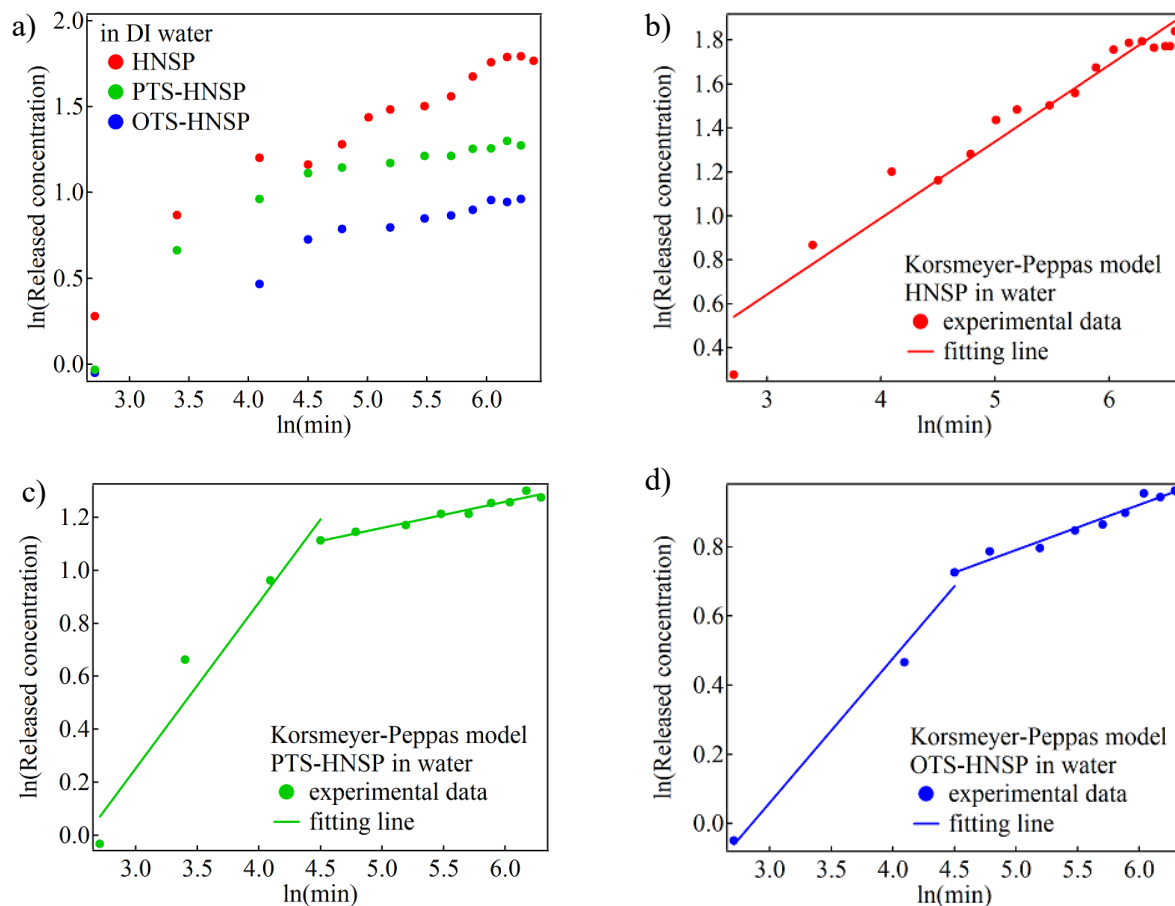

Figure S3 a) Korsmeyer-Peppas plots of time dependent FA release in deionized water and (b-d) fitting lines with Korsmeyer-Peppas equation mentioned in equation 3 in the main manuscript of b) HNSP, c) PTS-HNSP and d) OTS-HNSP.

## In EtOH

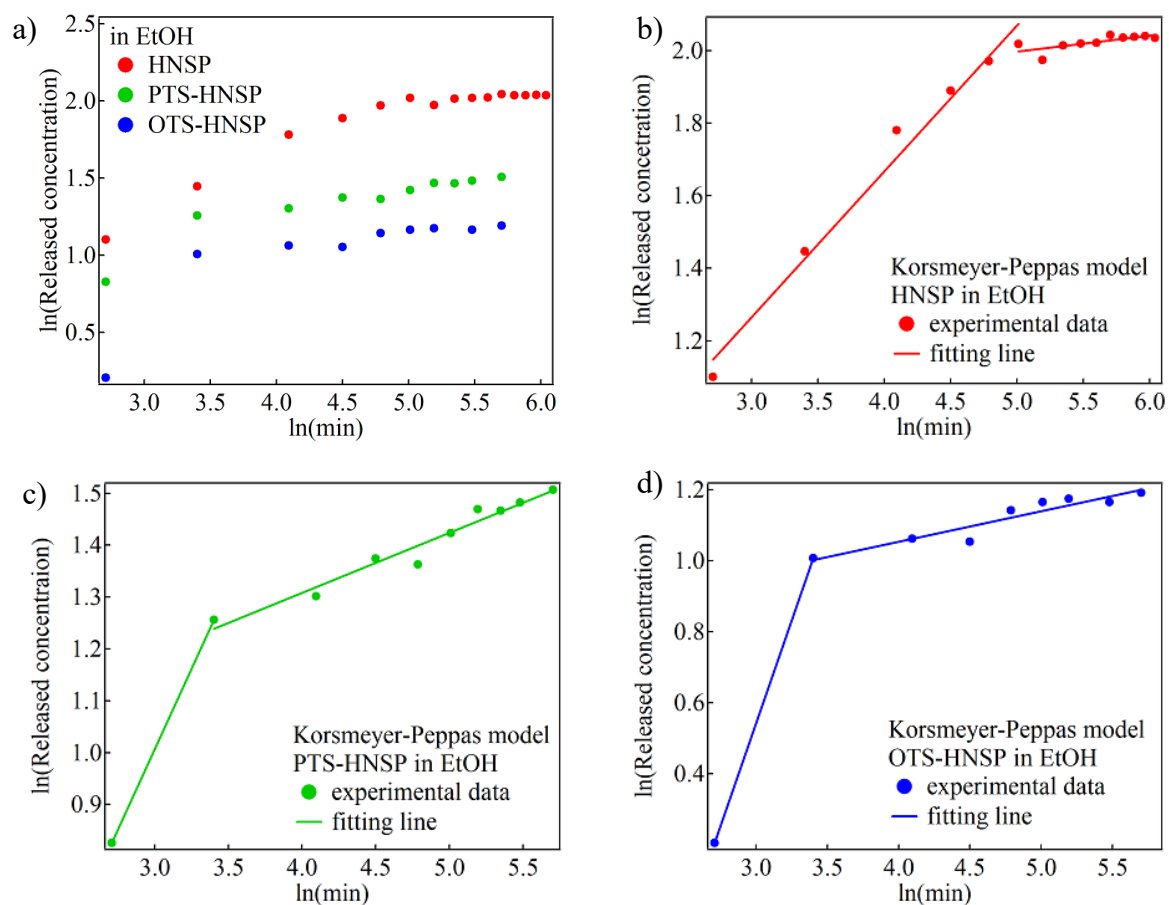

Figure S4 a) Korsmeyer-Peppas plots of time dependent FA release in deionized water and (b-d) fitting lines with Korsmeyer-Peppas equation mentioned in equation 3 in the main manuscript of b) HNRP, c) PTS-HNRP and d) OTS-HNRP.

**Elovich model**  
**In deionized water**

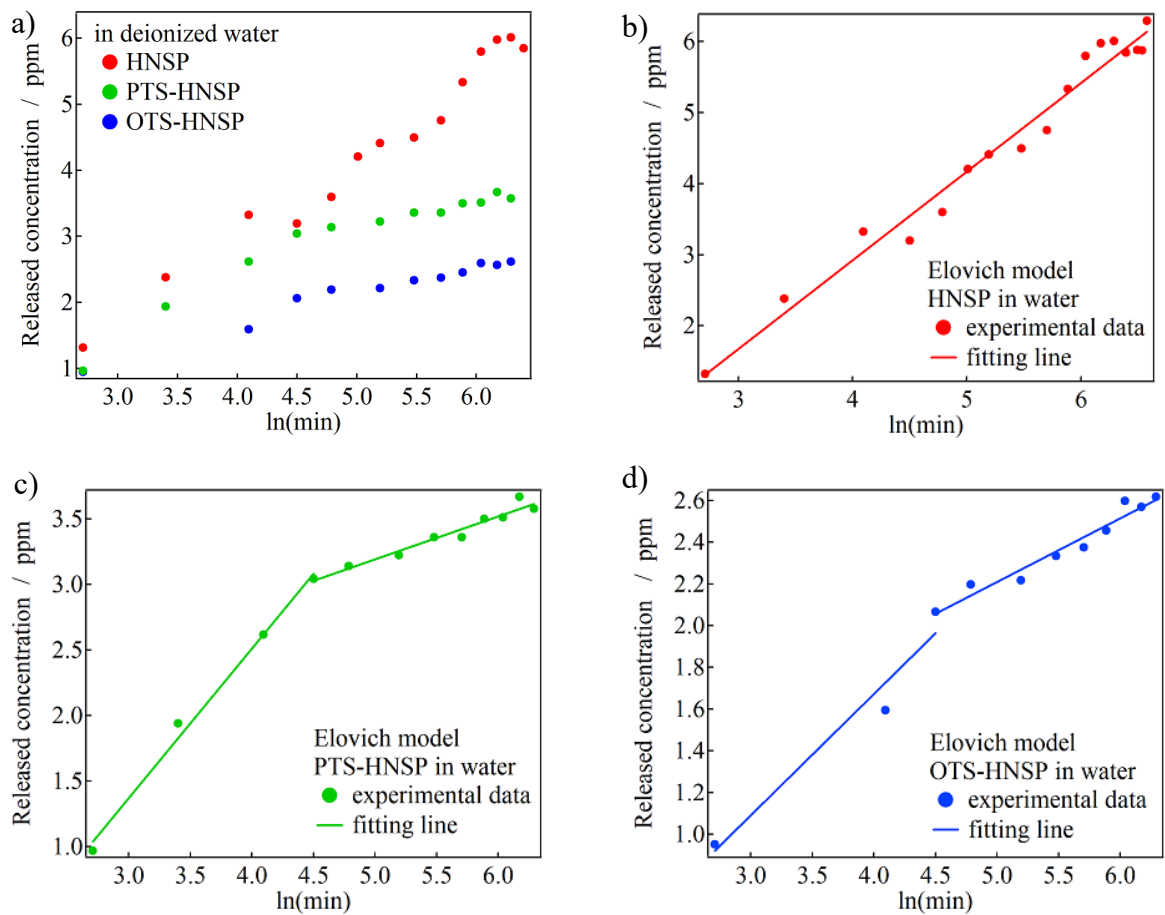

Figure S5        a) Elovich plots of time dependent FA release in deionized water and (b-d) fitting lines with Elovich equation mentioned in equation 4 in the main manuscript of b) HNSP, c) PTS-HNSP and d) OTS-HNSP.

Table S3        Fitting parameters for Elovich equation of HNSP, PTS-HSNP and OTS-HNSP in DI water.

| Carrier  | <i>a</i> | <i>b</i> | $\chi^2$ |
|----------|----------|----------|----------|
| HNSP     | 0.238    | 0.802    | 0.873    |
| PTS-HNSP | 0.189    | 0.875    | 0.0189   |
|          | 38.4     | 3.04     | 0.0164   |
| OTS-HNSP | 0.188    | 1.72     | 0.110    |
|          | 2.86     | 3.27     | 0.014    |

## In EtOH

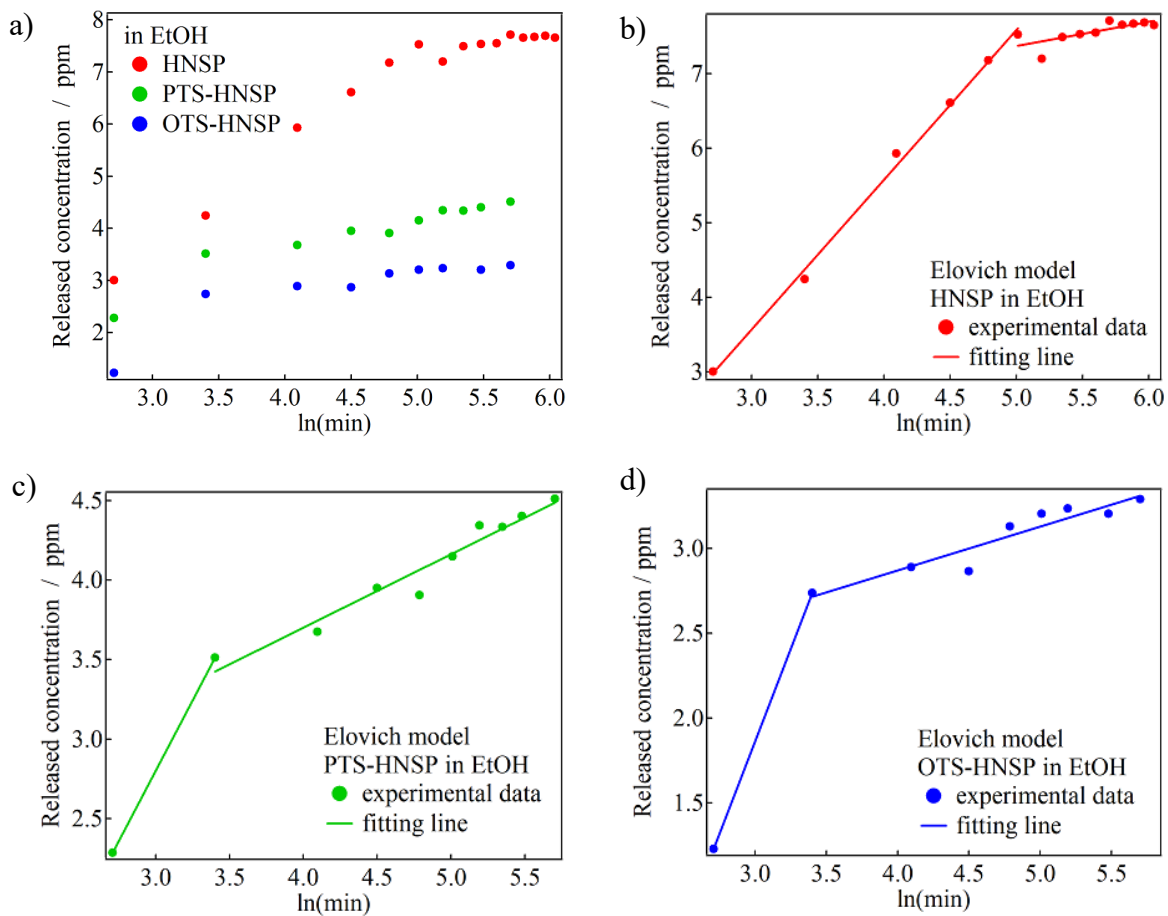

Figure S6 a) Elovich plots of time dependent FA release in EtOH and (b-d) fitting lines with Elovich equation mentioned in equation 4 in the main manuscript of b) HNSP, c) PTS-HNSP and d) OTS-HNSP.

Table S4 Fitting parameters for Elovich equation of HNSP, PTS-HNSP and OTS-HNSP in EtOH.

| Carrier  | $a$                | $b$   | $\chi^2$               |
|----------|--------------------|-------|------------------------|
| HNSP     | 0.592              | 0.497 | 0.0521                 |
|          | $1.38 \times 10^7$ | 3.06  | 0.0935                 |
| PTS-HNSP | 0.429              | 0.565 | $1.02 \times 10^{-29}$ |
|          | 25.9               | 2.17  | 0.0481                 |
| OTS-HNSP | 0.255              | 0.459 | $1.02 \times 10^{-30}$ |
|          | 317                | 3.87  | 0.0328                 |

## Hixson-Crowell model

### In deionized water

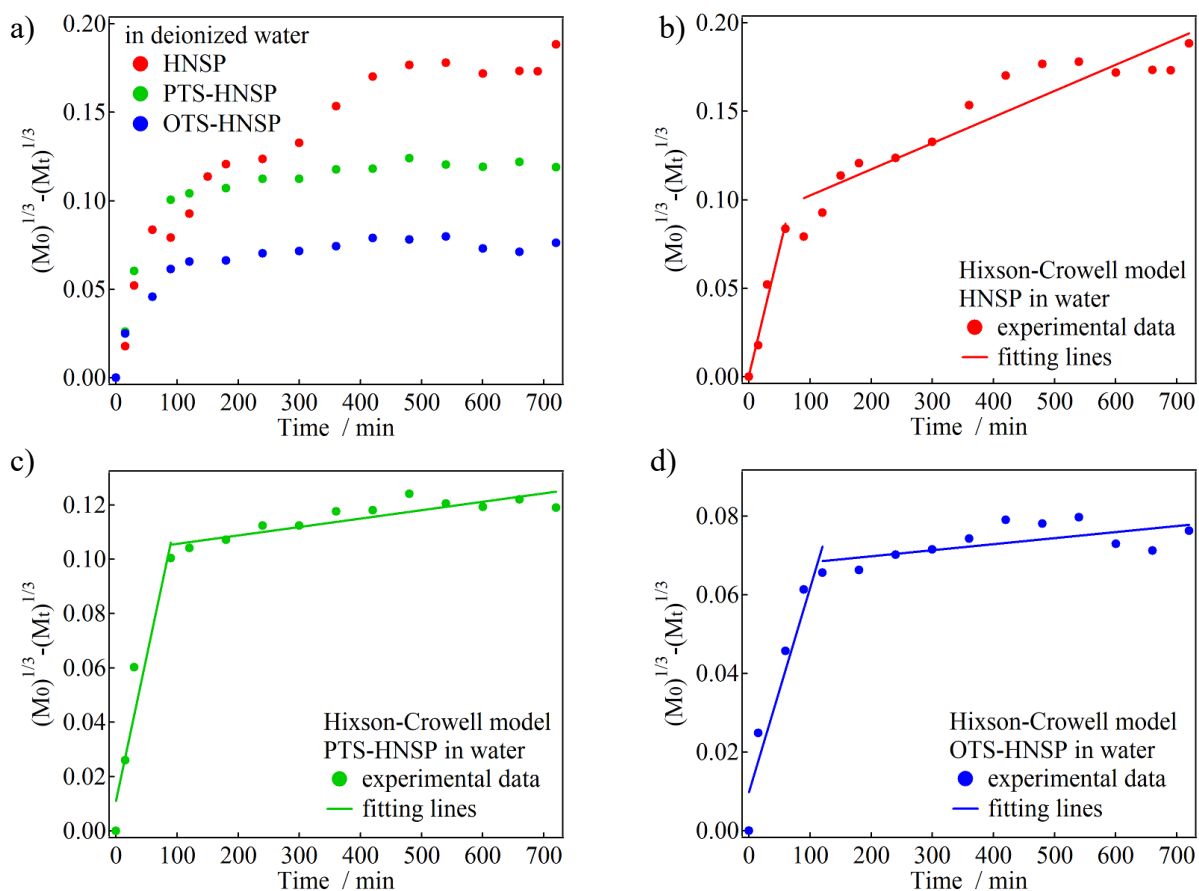

Figure S7 a) Hixson-Crowell plots of time dependent FA release in deionized water and (b-d) fitting lines with Hixson-Crowell equation mentioned in equation 5 in the main manuscript of b) HNSP, c) PTS-HNSP and d) OTS-HNSP.

Table S5 Fitting parameters for Hixson-Crowell equation of HNSP, PTS-HNSP and OTS-HNSP in deionized water.

| Carrier  | $k_{HC}$              | $\chi^2$              |
|----------|-----------------------|-----------------------|
| HNSP     | 0.00143               | 0.00101               |
|          | $1.48 \times 10^{-4}$ | $2.16 \times 10^{-4}$ |
| PTS-HNSP | 0.00110               | $4.61 \times 10^{-4}$ |
|          | $3.09 \times 10^{-5}$ | $1.42 \times 10^{-4}$ |
| OTS-HNSP | $5.21 \times 10^{-4}$ | $2.37 \times 10^{-4}$ |
|          | $1.53 \times 10^{-5}$ | $1.39 \times 10^{-4}$ |



## In EtOH

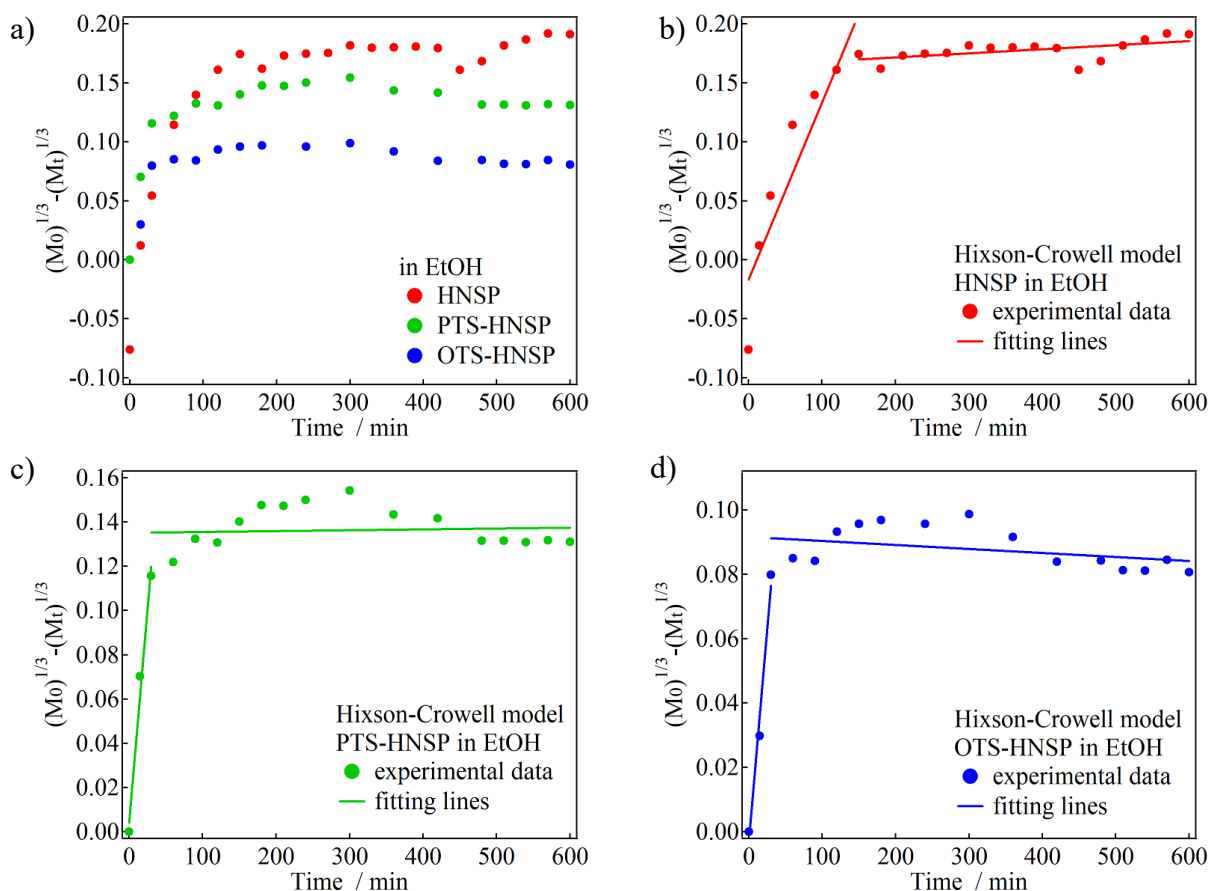

Figure S8 a) Hixson-Crowell plots of time dependent FA release in EtOH and (b-d) fitting lines with Hixson-Crowell equation mentioned in equation 5 in the main manuscript of b) HNRP, c) PTS-HNSP and d) OTS-HNSP in EtOH.

Table S6 Fitting parameters for Hixson-Crowell equation of HNRP, PTS-HNSP and OTS-HNSP in EtOH.

| Carrier  | $k_{HC}$              | $\chi^2$              |
|----------|-----------------------|-----------------------|
| HNRP     | 0.00150               | 0.00752               |
|          | $3.4 \times 10^{-5}$  | $8.16 \times 10^{-4}$ |
| PTS-HNSP | 0.00386               | $1.02 \times 10^{-4}$ |
|          | $3.86 \times 10^{-6}$ | 0.00165               |
| OTS-HNSP | 0.00266               | $6.74 \times 10^{-5}$ |
|          | -1.25                 | $5.45 \times 10^{-4}$ |
